# Supplementary material for: Song Bu Li Decoction, a Traditional Uyghur Medicine, Protects Cell Death by Regulation of Oxidative Stress and Differentiation in Cultured PC12 Cells
Source: Hindawi journal article supplement (doi:10.1155/2013/687958), 2013-01-01
Supplement: f1 [file 687958.f1.pdf]

**Supplementary Table 1. Calibration curve, LOD and LOQ of marker chemicals in NRR extract**

| <b>Chemical</b>     | <b>Calibration curve <sup>a</sup></b> | <b>Correlation coefficient (r<sup>2</sup>)</b> | <b>Linear range (µg/mL)</b> | <b>LOD <sup>b</sup> (µg/mL)</b> | <b>LOQ <sup>c</sup> (µg/mL)</b> |
|---------------------|---------------------------------------|------------------------------------------------|-----------------------------|---------------------------------|---------------------------------|
| <b>Ferulic acid</b> | y=55.833x+17.313                      | 0.9996                                         | 0.09-50                     | 0.10                            | 0.19                            |
| <b>Linarin</b>      | y=25.093x+1.1019                      | 1.0000                                         | 0.09-50                     | 0.10                            | 0.39                            |

<sup>a</sup> Calibration curve was constructed by plotting the peak area versus the concentration of each analytes. The calibration curve was derived from six data points,  $n = 3$ , and the SD was < 5% of the mean.

<sup>b</sup> LOD refers to the limits of detection.

<sup>c</sup> LOQ refers to the limits of the quantification.
